# Supplementary material
Source: PubMed Central journal article supplement (PMC9045034)
Supplement: 41579_2022_731_MOESM1_ESM.pdf [file 41579_2022_731_MOESM1_ESM.pdf]

**Supplementary information**

---

**Anti-tuberculosis treatment strategies and drug development: challenges and priorities**

---

In the format provided by the authors and unedited

**Supplementary Table 1:** approved 1<sup>st</sup>, 2<sup>nd</sup> and 3<sup>rd</sup> line agents recommended for treatment of active TB (\*)

| Disease indication                                                                                    | Drug or drug class                                               | Year of discovery/approval | Route of administration                                      | Comments                                                                                                                                                          |
|-------------------------------------------------------------------------------------------------------|------------------------------------------------------------------|----------------------------|--------------------------------------------------------------|-------------------------------------------------------------------------------------------------------------------------------------------------------------------|
| Drug susceptible TB                                                                                   | Isoniazid (INH)                                                  | 1952/1952                  | Oral                                                         | Administered as 2 months of INH-PZA-RIF-EMB (intensive phase, approved as Rifater drug combination in 1994) followed by 4 months of INH-RIF (continuation phase). |
|                                                                                                       | Pyrazinamide (PZA)                                               | 1952/1953                  | Oral                                                         |                                                                                                                                                                   |
|                                                                                                       | Rifampicin (RIF)                                                 | 1966/1974                  | Oral                                                         |                                                                                                                                                                   |
|                                                                                                       | Ethambutol (EMB)                                                 | 1961/1968                  | Oral                                                         |                                                                                                                                                                   |
|                                                                                                       | Rifapentine (RPT)                                                | 1965/1998                  | Oral                                                         |                                                                                                                                                                   |
| Multidrug resistant (MDR) TB (resistant to INH and RIF) (**)                                          | Fluoroquinolones (levofloxacin, moxifloxacin)                    | 1987/1998, 1991/1999       | Oral                                                         |                                                                                                                                                                   |
|                                                                                                       | Aminoglycosides (streptomycin, amikacin)                         | 1946/1947, 1971/1993       | Injectable (i.m or i.v.)                                     | Gradually replaced with bedaquiline where available <sup>1</sup>                                                                                                  |
|                                                                                                       | Rifabutin (RBT)                                                  | 1975/1992                  | Oral                                                         | 5-10% of RIF-resistant strains are susceptible to and can be treated with RBT                                                                                     |
|                                                                                                       | Capreomycin                                                      | 1960/1973                  | Injectable (i.m or i.v.)                                     |                                                                                                                                                                   |
|                                                                                                       | Pyrazinamide                                                     | 1952/1953                  | Oral                                                         |                                                                                                                                                                   |
|                                                                                                       | Ethambutol                                                       | 1961/1968                  | Oral                                                         |                                                                                                                                                                   |
|                                                                                                       | Thioamides (ethionamide, prothionamide)                          | 1956/1968                  | Oral                                                         | Date of discovery/approval of prothionamide not available                                                                                                         |
|                                                                                                       | Para-amino-salicylate                                            | 1944/1950                  | Oral                                                         |                                                                                                                                                                   |
|                                                                                                       | Cycloserine                                                      | 1954/1968                  | Oral                                                         |                                                                                                                                                                   |
|                                                                                                       | Bedaquiline                                                      | 2004/2012                  | Oral                                                         |                                                                                                                                                                   |
| Nitroimidazole delamanid                                                                              | 2006/2014                                                        | Oral                       | Approved by the EMEA but not the FDA for treatment of MDR-TB |                                                                                                                                                                   |
| Extensively drug resistant (XDR) TB (resistant to INH, RIF, fluoroquinolones and one injectable) (**) | Nitroimidazole pretomanid                                        | 2000/2019                  | Oral                                                         | FDA-approved for highly drug resistant forms of TB in combination with bedaquiline and linezolid                                                                  |
|                                                                                                       | Clofazimine                                                      | 1954/1969                  | Oral                                                         | Approved for the treatment of leprosy in 1969; approved for off-label compassionate use (expanded access) against TB                                              |
|                                                                                                       | Linezolid                                                        | Mid-1990s/ 2000            | Oral                                                         | Approved for off-label use only against TB                                                                                                                        |
|                                                                                                       | MDR-TB drugs as appropriate based on drug susceptibility profile |                            |                                                              |                                                                                                                                                                   |

(\*) See <sup>5</sup> for a recent and comprehensive review.

(\*\*) A 3 to 5 drug regimen is optimized based on the individual's drug susceptibility profile. i.m.: intramuscular; i.v. : intravenous; EMEA: European Medicines Evaluation Agency

**Supplementary Table 2:** proposed biomarkers of progression from LTBI to active TB

| Study type / methodology                                                                                                                                                              | Discovery or validation cohorts                                                                                     | Study outcome                                                                                                                                                                                                                                                                                | references |
|---------------------------------------------------------------------------------------------------------------------------------------------------------------------------------------|---------------------------------------------------------------------------------------------------------------------|----------------------------------------------------------------------------------------------------------------------------------------------------------------------------------------------------------------------------------------------------------------------------------------------|------------|
| <b>Immunodiagnosics</b>                                                                                                                                                               |                                                                                                                     |                                                                                                                                                                                                                                                                                              |            |
| Various interferon- $\gamma$ release assays (IGRA) used as a baseline “Target Product Profile” by the WHO (*) to benchmark improvements in sensitivity and specificity of new markers | Multiple large cohorts in UK, South Africa, Norway, 10 European countries, and Germany                              | Limited sensitivity and specificity of IGRAs to predict incipient TB among subjects with LTBI.                                                                                                                                                                                               | 6-10 11    |
| IGRA versus tuberculin skin test                                                                                                                                                      | Meta-analysis of 15 studies across 4 continents                                                                     | Highlights the comparable predictive ability of both tests, the limited predictive value of a single test and the need for longitudinal testing to improve accuracy and facilitate interpretation                                                                                            | 12         |
| <b>Transcriptomics</b>                                                                                                                                                                |                                                                                                                     |                                                                                                                                                                                                                                                                                              |            |
| Clinical blood transcriptomics                                                                                                                                                        | Compiled analysis of multiple cohorts                                                                               | Systematic comparison and evaluation of 17 and 7 blood signatures, respectively, of incipient TB, and identification of best performing signatures                                                                                                                                           | 13,14,15   |
| Whole blood RNA sequencing                                                                                                                                                            | 47 progressors and 107 matched controls from Adolescent Cohort Study or ACS <sup>16</sup>                           | 16-gene signature (ZAK16) of risk of progression in the 12 months preceding TB diagnosis                                                                                                                                                                                                     | 17         |
| Blood transcriptomics of 11 genes selected from ZAK16, by RT-qPCR                                                                                                                     | 2 validation cohorts: (1) 820 HIV-positive subjects, and (2) 764 RISK-positive and 1,784 RISK-negative participants | Validation of an 11-gene signature (RISK11) for diagnosis of symptomatic tuberculosis, and for short-term prediction of incident tuberculosis: RISK11 identified prevalent tuberculosis and predicted risk of progression to incident tuberculosis within 15 months in HIV-positive subjects | 18,19 (**) |
| Blood-based transcriptomics linked to PET/CT findings                                                                                                                                 | 10 likely progressors identified by PET/CT among 35                                                                 | Transcripts of the classical complement pathway and Fc $\gamma$ receptor 1 overabundant in subclinical stages of disease; validated in HIV-negative cohort from Zak <i>et al.</i> <sup>17</sup>                                                                                              | 20         |

|                                                                                  |                                                                                                                                                 |                                                                                                                                                                                                                                                                                                                    |                  |
|----------------------------------------------------------------------------------|-------------------------------------------------------------------------------------------------------------------------------------------------|--------------------------------------------------------------------------------------------------------------------------------------------------------------------------------------------------------------------------------------------------------------------------------------------------------------------|------------------|
|                                                                                  | HIV-positive subjects with LTBI                                                                                                                 |                                                                                                                                                                                                                                                                                                                    |                  |
| Whole blood RNAseq, plasma proteome and purified T cell gene expression analysis | 44 progressors and 107 matched controls from ACS                                                                                                | Longitudinal blood transcriptional analysis complemented with proteomic analysis of plasma and T cell responses, indicating orchestrated changes that precede progression to TB disease.                                                                                                                           | <sup>21</sup>    |
| Whole blood RNA sequencing                                                       | 12 progressors and 48 non-progressors                                                                                                           | A 3-gene signature (ROE3) for short term risk of progression within 90 days in HIV-negative subjects (BATF2, GBP5, and SCARF1)                                                                                                                                                                                     | <sup>22</sup>    |
| Whole blood RNA sequencing and RT-qPCR                                           | 79 progressors and 328 matched non-progressors from ACS                                                                                         | 2- and 4-gene signatures of risk to progression in 3 to 24 months preceding TB diagnosis                                                                                                                                                                                                                           | <sup>23 24</sup> |
| Blood RNA sequencing and RT-qPCR in adolescents                                  | 43 progressors among 144 adolescents with LTBI <sup>(***)</sup>                                                                                 | Validation of a 3-gene signature – initially discovered to distinguish active TB from healthy individuals – to predict risk of progression to active TB                                                                                                                                                            | <sup>25,26</sup> |
| RNAseq of peripheral blood mononuclear cells                                     | 16 progressors and 21 non-progressors for the new signature discovery set                                                                       | Evaluated the predictive performance of six published signatures on the transcriptional profiles of peripheral blood mononuclear cells from progressors and non-progressors during a five-year follow-up, and derived a new 29-gene signature that predicts progression up to 5 years prior to disease development | <sup>27</sup>    |
| Blood transcriptomics by RT-qPCR                                                 | ACS as discovery cohort; 7 large validation cohorts                                                                                             | A 6-gene transcriptomic signature of TB disease risk, validated by blind application using microfluidic qRT-PCR to samples from seven different cohorts                                                                                                                                                            | <sup>28</sup>    |
| Blood transcriptomic analyses of human, mouse, and macaque samples               | ACS (46 progressors and 107 matched controls), mouse: 16 progressors, 13 controllers, 10 naïve; macaque: 8 progressors, 4 controllers, 4 naïve. | From <sup>21</sup> and <sup>28</sup> , identified differentially expressed genes in controllers and progressors across species, and defined a TB risk signature gene in humans, mice and macaques                                                                                                                  | <sup>29</sup>    |
| <b>Genetics</b>                                                                  |                                                                                                                                                 |                                                                                                                                                                                                                                                                                                                    |                  |
| Genome Wide Association Study                                                    | 2175 early progressors and 1827 non-                                                                                                            | Identified variants of monocyte-specific regulatory element in 3q23                                                                                                                                                                                                                                                | <sup>30</sup>    |

|                                                                                          |                                                                                                                      |                                                                                                                                                                                                                                                                                                                                                           |               |
|------------------------------------------------------------------------------------------|----------------------------------------------------------------------------------------------------------------------|-----------------------------------------------------------------------------------------------------------------------------------------------------------------------------------------------------------------------------------------------------------------------------------------------------------------------------------------------------------|---------------|
|                                                                                          | progressing household contacts                                                                                       |                                                                                                                                                                                                                                                                                                                                                           |               |
| Epigenetics and proteomics in monocytes and granulocytes                                 | 8 active TB and 8 LTBI                                                                                               | Pilot study linking DNA methylome, transcriptome and proteome to distinguish LTBI from active TB                                                                                                                                                                                                                                                          | <sup>31</sup> |
| <b>Proteomics</b>                                                                        |                                                                                                                      |                                                                                                                                                                                                                                                                                                                                                           |               |
| Highly multiplexed proteomic assay (SOMAscan) to quantify 3,000 human proteins in plasma | ACS (44 progressors and 107 matched controls) for discovery; 1,948 HIV-negative household TB contacts for validation | Identified a 5-protein signature, TB Risk Model 5 (TRM5), and 3-protein signature, 3-protein pair-ratio (3PR) with excellent predictive value within 6 months of active TB diagnosis                                                                                                                                                                      | <sup>32</sup> |
| <b>Imaging</b>                                                                           |                                                                                                                      |                                                                                                                                                                                                                                                                                                                                                           |               |
| PET-CT imaging                                                                           | 35 HIV-positive subjects with LTBI                                                                                   | 10 subjects with subclinical TB identified by PET/CT, progression to active TB not assessed                                                                                                                                                                                                                                                               | <sup>33</sup> |
| PET/MRI imaging                                                                          | 30 household contacts of active TB index cases                                                                       | Identified abnormalities in asymptomatic patients indicative of subclinical TB; no significant correlation between presence of PET/MRI abnormalities (SUVmax values) and initial quantitative IGRA values                                                                                                                                                 | <sup>34</sup> |
| PET-CT/MRI across species                                                                | Not included, study compilation                                                                                      | Exhaustive review covering PET, MRI and/or CT imaging in mouse, rabbit, and non-human primate models, and in TB patients, as (i) a tool to study and predict progression to active disease, (ii) a biomarker of treatment response and relapse, (iii) a patient stratification tool for clinical trials, and (iv) a modality to measure vaccine efficacy. | <sup>35</sup> |

(\*) <https://apps.who.int/iris/bitstream/handle/10665/259176/WHOHTM-TB-2017.18-eng.pdf?sequence=1>

(\*\*) see appendix to <sup>15</sup> for a comparison of individual signature performance to the WHO Target Product Profile criteria

(\*\*\*) this was the validation cohort. The discovery cohort in <sup>26</sup> included n = 1023 samples

**Supplementary Table 3:** Selected animal models used to evaluate drug efficacy against active TB and/or penetration at the site of disease

| Species and Model                                  | Relative cost/Duration | Compound requirements (*) | Major Read-out(s)                                                                   | Strengths                                                                                                                                                    | Limitations                                                                                                                                         | References |
|----------------------------------------------------|------------------------|---------------------------|-------------------------------------------------------------------------------------|--------------------------------------------------------------------------------------------------------------------------------------------------------------|-----------------------------------------------------------------------------------------------------------------------------------------------------|------------|
| Zebrafish (larvae)                                 | + / 1-2 weeks          | ≤ 1 mg                    | Survival, fluorescence as a surrogate of CFU                                        | Amenable to medium throughput drug screening                                                                                                                 | Absence of pulmonary site of infection                                                                                                              | 36,37      |
| BALB/c acute model of low dose aerosol infection   | ++ / 2 months          | ≤ 1 g                     | Δ lung CFU of treated versus control in the fast-replicating phase of infection     | Rapid, low cost, modest space requirements; large body of published data available as benchmark                                                              | Lack of necrotic lesions and cavities                                                                                                               | 38,39      |
| BALB/c chronic model of low dose aerosol infection | ++/ 3 months           | ≤ 1 g                     | Δ lung CFU of treated versus control in the slow/non-replicating phase of infection |                                                                                                                                                              |                                                                                                                                                     |            |
| BALB/c relapse model                               | +++ / 8-12 months      | 6-10 g                    | Δ lung CFU, relapse rate following varying treatment durations                      |                                                                                                                                                              |                                                                                                                                                     |            |
| C3HeB/FeJ necrotic lesion model                    | +++ / 4-6 months       | 1-3 g                     | Δ lung CFU and relapse rates; site-of-disease pharmacokinetics                      | Presence of large necrotic lesions; pathology variability delivers bimodal response of drug efficacy in necrotic versus cellular lesions (two models in one) | Large sample size required due to varying pathology; model is very sensitive to strain and inoculum size (inter-lab reproducibility is a challenge) | 40-43      |
| Guinea pig model                                   | +++ / 4-5 months       | 10-20 g                   | Δ lung CFU                                                                          | Presence of cellular, caseating and calcified granulomas                                                                                                     | Limited body of efficacy data to estimate the predictive value of the model; used more frequently to evaluate vaccine than drug efficacy            | 44-46      |
| Rabbit cavitory model                              | +++ / 5-6 months       | 20-200 g                  | single lesion CFU; site-of-disease pharmacokinetics                                 | Presence of cellular, necrotic, cavitating granulomas and open cavities                                                                                      | Not validated for efficacy studies of drug regimens                                                                                                 | 47-50      |

|                             |                     |          |                                                                                                                                          |                                                                                                                                                              |                                                     |       |
|-----------------------------|---------------------|----------|------------------------------------------------------------------------------------------------------------------------------------------|--------------------------------------------------------------------------------------------------------------------------------------------------------------|-----------------------------------------------------|-------|
| Marmoset model of active TB | ++++ / 5-6 months   | 10-20 g  | single lesion CFU; corresponding <sup>18</sup> FDG uptake by PET as a measure of lesion-associated inflammation; volume of disease by CT | Recapitulates major human pathology features; PET-CT read out allows for longitudinal evaluation and reduced numbers of animals; small animal size (~ 500 g) | Cost, bioethics, model validation still in progress | 51,52 |
| Macaque model of active TB  | +++++ / 6-12 months | 50-300 g | Same as above; relapse following SIV infection                                                                                           | Same as above; ability to co-infect macaques with SIV to model HIV co-infection                                                                              | Cost, space requirements, bioethics                 | 53-55 |

(\*) conservative estimates based on average sample size, average human equivalent dose, and treatment duration recorded in the literature; CFU: colony forming unit; PET: positron emission tomography; <sup>18</sup>FDG: fluoro-deoxy-glucose (PET tracer); CT: computerized tomography; NHP: non-human primate; SIV: Simian Immunodeficiency Virus.



## **Supplementary Box 1 | Propose, apply, and endorse new clinical trial designs to improve the pace of regimen development**

Adaptive trial designs rely on accumulated data and interim analyses to make preplanned adaptations, such as stopping an arm early for futility or safety and increasing allocation ratios to best performing arms. They are usually more efficient and informative than traditional fixed designs, offer savings in time, resources, and sample size <sup>2</sup>. One such adaptive design applied to TB trials is the Multi-Arm Multi-Stage (MAMS) concept, under which multiple treatment options are compared simultaneously, against a control arm. These can either be different drug combinations, doses, or treatment durations. Through interim analyses with predetermined adaptation rules, randomization can be adjusted to reallocate patients to most effective or least toxic regimens <sup>3</sup>. MAMS has been applied to inventive Phase II trials such as TRUNCATE-TB (<https://www.newtbdrugs.org/pipeline/trials/truncate-tb>).

A new Phase IIC trial design has been created specifically in the context of TB to accelerate regimen development: the Selection Trial with Extended Post-treatment follow-up (STEP) <sup>4</sup>. Experimental regimens are given for the duration for which they will be studied in phase III and patients are followed for clinical outcomes of treatment failure and relapse for a total of 12 months from randomization. Collection of clinical outcome data in a relatively small number of participants over only 12 months provides information about the likelihood of success of each arm in a phase III trial. MAMS and STEP can be sequentially combined to accelerate both Phase II and III trials.

In the figure below, the adaptive design principle (a), MAMS (b), STEP (c) and a two stage STEP-to-STEP (d) schematic designs are shown. In the STEP-to-STEP stage 1, two new regimens are compared side-by-side to the standard of care, leading to go/no go decisions and if appropriate, the selection of best performing new combination at the completion of the 12-month follow up. In stage 2, different durations of the selected regimen are tested to identify the shortest treatment duration delivering non-inferiority results.

### a Adaptive trial design

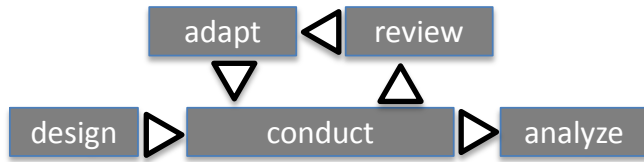

### b MAMS design

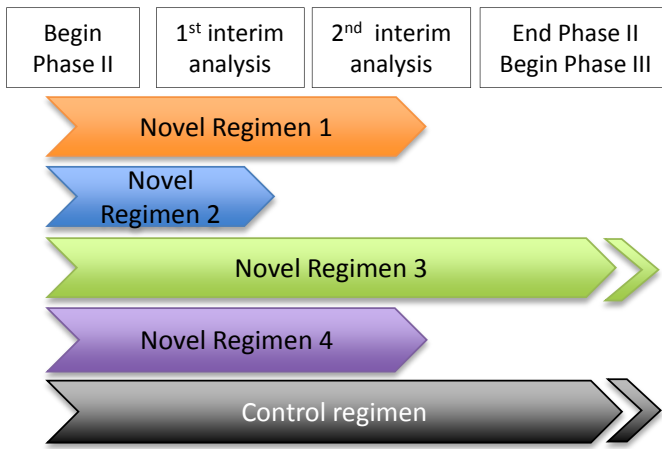

### c STEP design

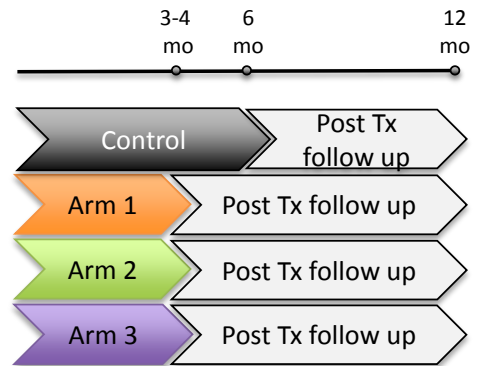

### d STEP to STEP design

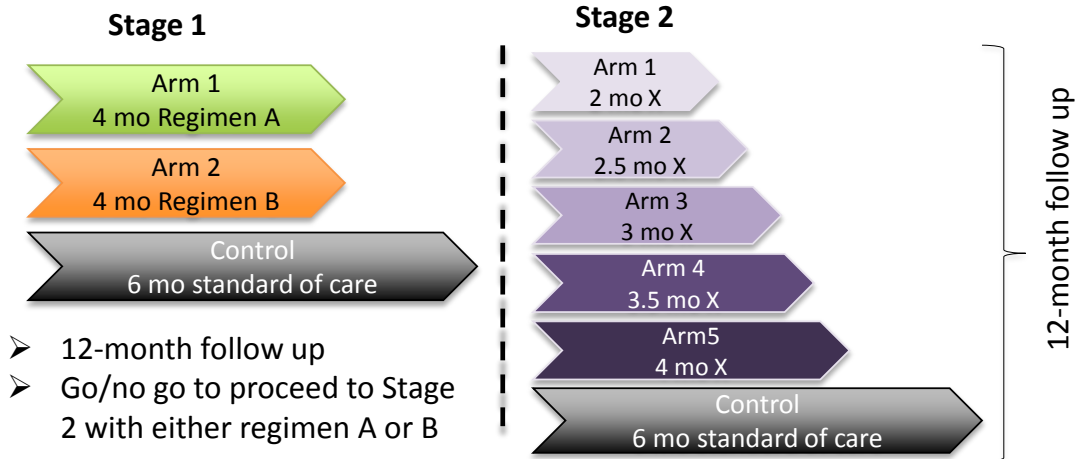

Panel c reprinted from ref 4, CC BY 4.0

## REFERENCES

- 1 WHO. WHO consolidated guidelines on drug-resistant tuberculosis treatment. Report No. ISBN 978-92-4-155052-9, (World Health Organization, Geneva, Switzerland, 2019).
- 2 Millen, G. C. & Yap, C. Adaptive trial designs: what are multiarm, multistage trials? *Arch Dis Child Educ Pract Ed* **105**, 376-378, doi:10.1136/archdischild-2019-317826 (2020).
- 3 Cellamare, M., Ventz, S., Baudin, E., Mitnick, C. D. & Trippa, L. A Bayesian response-adaptive trial in tuberculosis: The endTB trial. *Clin Trials* **14**, 17-28, doi:10.1177/1740774516665090 (2017).
- 4 Phillips, P. P. *et al.* A new trial design to accelerate tuberculosis drug development: the Phase IIC Selection Trial with Extended Post-treatment follow-up (STEP). *BMC Med* **14**, 51, doi:10.1186/s12916-016-0597-3 (2016).
- 5 Horsburgh, C. R., Jr., Barry, C. E., 3rd & Lange, C. Treatment of Tuberculosis. *N Engl J Med* **373**, 2149-2160, doi:10.1056/NEJMra1413919 (2015).
- 6 Gupta, R. K. *et al.* Quantitative IFN-gamma Release Assay and Tuberculin Skin Test Results to Predict Incident Tuberculosis. A Prospective Cohort Study. *Am J Respir Crit Care Med* **201**, 984-991, doi:10.1164/rccm.201905-0969OC (2020).
- 7 Andrews, J. R. *et al.* Serial QuantiFERON testing and tuberculosis disease risk among young children: an observational cohort study. *Lancet Respir Med* **5**, 282-290, doi:10.1016/S2213-2600(17)30060-7 (2017).
- 8 Winje, B. A. *et al.* Stratification by interferon-gamma release assay level predicts risk of incident TB. *Thorax*, doi:10.1136/thoraxjnl-2017-211147 (2018).
- 9 Zellweger, J. P. *et al.* Risk Assessment of Tuberculosis in Contacts by IFN-gamma Release Assays. A Tuberculosis Network European Trials Group Study. *Am J Respir Crit Care Med* **191**, 1176-1184, doi:10.1164/rccm.201502-0232OC (2015).
- 10 Diel, R., Loddenkemper, R., Niemann, S., Meywald-Walter, K. & Nienhaus, A. Negative and positive predictive value of a whole-blood interferon-gamma release assay for developing active tuberculosis: an update. *Am J Respir Crit Care Med* **183**, 88-95, doi:10.1164/rccm.201006-0974OC (2011).
- 11 Dheda, K. & Davids, M. Latent Tuberculosis Infection-associated Immunodiagnostic Test Responses as Biomarkers of Incipient Tuberculosis: Fruitful or Futile? *Am J Respir Crit Care Med* **201**, 895-898, doi:10.1164/rccm.201912-2425ED (2020).
- 12 Rangaka, M. X. *et al.* Predictive value of interferon-gamma release assays for incident active tuberculosis: a systematic review and meta-analysis. *Lancet Infect Dis* **12**, 45-55, doi:10.1016/S1473-3099(11)70210-9 (2012).
- 13 Warsinske, H., Vashisht, R. & Khatri, P. Host-response-based gene signatures for tuberculosis diagnosis: A systematic comparison of 16 signatures. *PLoS Med* **16**, e1002786, doi:10.1371/journal.pmed.1002786 (2019).
- 14 Gupta, R. K. *et al.* Concise whole blood transcriptional signatures for incipient tuberculosis: a systematic review and patient-level pooled meta-analysis. *Lancet Respir Med* **8**, 395-406, doi:10.1016/S2213-2600(19)30282-6 (2020).
- 15 Turner, C. T. *et al.* Blood transcriptional biomarkers for active pulmonary tuberculosis in a high-burden setting: a prospective, observational, diagnostic accuracy study. *Lancet Respir Med* **8**, 407-419, doi:10.1016/S2213-2600(19)30469-2 (2020).
- 16 Mahomed, H. *et al.* TB incidence in an adolescent cohort in South Africa. *PLoS One* **8**, e59652, doi:10.1371/journal.pone.0059652 (2013).
- 17 Zak, D. E. *et al.* A blood RNA signature for tuberculosis disease risk: a prospective cohort study. *Lancet* **387**, 2312-2322, doi:10.1016/S0140-6736(15)01316-1 (2016).

- 18 Mendelsohn, S. C. *et al.* Validation of a host blood transcriptomic biomarker for pulmonary tuberculosis in people living with HIV: a prospective diagnostic and prognostic accuracy study. *Lancet Glob Health* **9**, e841-e853, doi:10.1016/S2214-109X(21)00045-0 (2021).
- 19 Scriba, T. J. *et al.* Biomarker-guided tuberculosis preventive therapy (CORTIS): a randomised controlled trial. *Lancet Infect Dis* **21**, 354-365, doi:10.1016/S1473-3099(20)30914-2 (2021).
- 20 Esmail, H. *et al.* Complement pathway gene activation and rising circulating immune complexes characterize early disease in HIV-associated tuberculosis. *Proc Natl Acad Sci U S A* **115**, E964-E973, doi:10.1073/pnas.1711853115 (2018).
- 21 Scriba, T. J. *et al.* Sequential inflammatory processes define human progression from M. tuberculosis infection to tuberculosis disease. *PLoS Pathog* **13**, e1006687, doi:10.1371/journal.ppat.1006687 (2017).
- 22 Roe, J. *et al.* Blood Transcriptomic Stratification of Short-term Risk in Contacts of Tuberculosis. *Clin Infect Dis* **70**, 731-737, doi:10.1093/cid/ciz252 (2020).
- 23 Suliman, S. *et al.* Four-Gene Pan-African Blood Signature Predicts Progression to Tuberculosis. *Am J Respir Crit Care Med* **197**, 1198-1208, doi:10.1164/rccm.201711-2340OC (2018).
- 24 Schumacher, S. G. & Denkinger, C. M. Diagnostic Test for Incipient Tuberculosis: A Step Forward, Many More to Go. *Am J Respir Crit Care Med* **197**, 1106-1107, doi:10.1164/rccm.201803-0469ED (2018).
- 25 Warsinske, H. C. *et al.* Assessment of Validity of a Blood-Based 3-Gene Signature Score for Progression and Diagnosis of Tuberculosis, Disease Severity, and Treatment Response. *JAMA Netw Open* **1**, e183779, doi:10.1001/jamanetworkopen.2018.3779 (2018).
- 26 Sweeney, T. E., Braviak, L., Tato, C. M. & Khatry, P. Genome-wide expression for diagnosis of pulmonary tuberculosis: a multicohort analysis. *Lancet Respir Med* **4**, 213-224, doi:10.1016/S2213-2600(16)00048-5 (2016).
- 27 Leong, S. *et al.* Cross-validation of existing signatures and derivation of a novel 29-gene transcriptomic signature predictive of progression to TB in a Brazilian cohort of household contacts of pulmonary TB. *Tuberculosis (Edinb)* **120**, 101898, doi:10.1016/j.tube.2020.101898 (2020).
- 28 Penn-Nicholson, A. *et al.* RISK6, a 6-gene transcriptomic signature of TB disease risk, diagnosis and treatment response. *Sci Rep* **10**, 8629, doi:10.1038/s41598-020-65043-8 (2020).
- 29 Ahmed, M. *et al.* Immune correlates of tuberculosis disease and risk translate across species. *Sci Transl Med* **12**, doi:10.1126/scitranslmed.aay0233 (2020).
- 30 Luo, Y. *et al.* Early progression to active tuberculosis is a highly heritable trait driven by 3q23 in Peruvians. *Nat Commun* **10**, 3765, doi:10.1038/s41467-019-11664-1 (2019).
- 31 Esterhuysen, M. M. *et al.* Epigenetics and Proteomics Join Transcriptomics in the Quest for Tuberculosis Biomarkers. *mBio* **6**, e01187-01115, doi:10.1128/mBio.01187-15 (2015).
- 32 Penn-Nicholson, A. *et al.* Discovery and validation of a prognostic proteomic signature for tuberculosis progression: A prospective cohort study. *PLoS Med* **16**, e1002781, doi:10.1371/journal.pmed.1002781 (2019).
- 33 Esmail, H. *et al.* Characterization of progressive HIV-associated tuberculosis using 2-deoxy-2-[(18)F]fluoro-D-glucose positron emission and computed tomography. *Nat Med* **22**, 1090-1093, doi:10.1038/nm.4161 (2016).
- 34 Molton, J. S. *et al.* Sub-clinical abnormalities detected by PET/MRI in household tuberculosis contacts. *BMC Infect Dis* **19**, 83, doi:10.1186/s12879-019-3705-0 (2019).
- 35 Malherbe, S. T., Kleynhans, L. & Walzl, G. The potential of imaging tools as correlates of infection and disease for new TB vaccine development. *Semin Immunol* **39**, 73-80, doi:10.1016/j.smim.2018.06.001 (2018).

- 36 Takaki, K., Cosma, C. L., Troll, M. A. & Ramakrishnan, L. An in vivo platform for rapid high-throughput antitubercular drug discovery. *Cell Rep* **2**, 175-184, doi:10.1016/j.celrep.2012.06.008 (2012).
- 37 Ordas, A. *et al.* Testing tuberculosis drug efficacy in a zebrafish high-throughput translational medicine screen. *Antimicrob Agents Chemother* **59**, 753-762, doi:10.1128/AAC.03588-14 (2015).
- 38 Nuermberger, E. Using animal models to develop new treatments for tuberculosis. *Semin Respir Crit Care Med* **29**, 542-551 (2008).
- 39 Nuermberger, E. L. Preclinical Efficacy Testing of New Drug Candidates. *Microbiol Spectr* **5**, doi:10.1128/microbiolspec.TB2-0034-2017 (2017).
- 40 Davis, S. L. *et al.* Noninvasive pulmonary [18F]-2-fluoro-deoxy-D-glucose positron emission tomography correlates with bactericidal activity of tuberculosis drug treatment. *Antimicrob Agents Chemother* **53**, 4879-4884, doi:10.1128/AAC.00789-09 (2009).
- 41 Driver, E. R. *et al.* Evaluation of a mouse model of necrotic granuloma formation using C3HeB/FeJ mice for testing of drugs against Mycobacterium tuberculosis. *Antimicrob Agents Chemother* **56**, 3181-3195, doi:10.1128/AAC.00217-12 (2012).
- 42 Rosenthal, I. M. *et al.* Dose-ranging comparison of rifampin and rifapentine in two pathologically distinct murine models of tuberculosis. *Antimicrob Agents Chemother* **56**, 4331-4340, doi:10.1128/AAC.00912-12 (2012).
- 43 Irwin, S. M. *et al.* Presence of multiple lesion types with vastly different microenvironments in C3HeB/FeJ mice following aerosol infection with Mycobacterium tuberculosis. *Dis Model Mech* **8**, 591-602, doi:10.1242/dmm.019570 (2015).
- 44 Palanisamy, G. S. *et al.* Disseminated disease severity as a measure of virulence of Mycobacterium tuberculosis in the guinea pig model. *Tuberculosis (Edinb)* **88**, 295-306 (2008).
- 45 Lenaerts, A. J. *et al.* Location of persisting mycobacteria in a Guinea pig model of tuberculosis revealed by r207910. *Antimicrob Agents Chemother* **51**, 3338-3345, doi:10.1128/AAC.00276-07 (2007).
- 46 Creissen, E., Izzo, L., Dawson, C. & Izzo, A. A. Guinea Pig Model of Mycobacterium tuberculosis Infection. *Curr Protoc* **1**, e312, doi:10.1002/cpz1.312 (2021).
- 47 Blanc, L. *et al.* Impact of immunopathology on the antituberculous activity of pyrazinamide. *J Exp Med* **215**, 1975-1986, doi:10.1084/jem.20180518 (2018).
- 48 Manabe, Y. C. *et al.* Different strains of Mycobacterium tuberculosis cause various spectrums of disease in the rabbit model of tuberculosis. *Infect Immun.* **71**, 6004-6011. (2003).
- 49 Subbian, S. *et al.* Chronic pulmonary cavitary tuberculosis in rabbits: a failed host immune response. *Open Biol* **1** (2011).
- 50 Via, L. E. *et al.* Infection Dynamics and Response to Chemotherapy in a Rabbit Model of Tuberculosis using [18F]2-Fluoro-Deoxy-D-Glucose Positron Emission Tomography and Computed Tomography. *Antimicrob Agents Chemother* **56**, 4391-4402, doi:10.1128/AAC.00531-12 (2012).
- 51 Via, L. E. *et al.* Differential virulence and disease progression following Mycobacterium tuberculosis complex infection of the common marmoset (Callithrix jacchus). *Infect Immun* **81**, 2909-2919, doi:10.1128/IAI.00632-13 (2013).
- 52 Via, L. E. *et al.* A Sterilizing Tuberculosis Treatment Regimen Is Associated with Faster Clearance of Bacteria in Cavitary Lesions in Marmosets. *Antimicrob Agents Chemother* **59**, 4181-4189, doi:10.1128/AAC.00115-15 (2015).
- 53 Kaushal, D., Mehra, S., Didier, P. J. & Lackner, A. A. The non-human primate model of tuberculosis. *J Med Primatol* **41**, 191-201, doi:10.1111/j.1600-0684.2012.00536.x (2012).

- 54 Lin, P. L. *et al.* Radiologic responses in cynomolgous macaques for assessing tuberculosis chemotherapy regimens. *Antimicrob Agents Chemother* **57**, 4237-4244, doi:10.1128/AAC.00277-13 (2013).
- 55 Foreman, T. W., Mehra, S., Lackner, A. A. & Kaushal, D. Translational Research in the Nonhuman Primate Model of Tuberculosis. *ILAR J* **58**, 151-159, doi:10.1093/ilar/ilx015 (2017).
